# Supplementary material for: Synthesis, Spectral Characterization and Crystals Structure of some Arsane Derivatives of Gold (I) Complexes: A Comparative Density Functional Theory Study
Source: PLOS journal article supplement (doi:10.1371/journal.pone.0119620), 2015-03-23

# checkCIF/PLATON report

Structure factors have been supplied for datablock(s) I

THIS REPORT IS FOR GUIDANCE ONLY. IF USED AS PART OF A REVIEW PROCEDURE FOR PUBLICATION, IT SHOULD NOT REPLACE THE EXPERTISE OF AN EXPERIENCED CRYSTALLOGRAPHIC REFEREE.

No syntax errors found.      CIF dictionary      Interpreting this report

## Datablock: I

---

|                    |                              |                                    |
|--------------------|------------------------------|------------------------------------|
| Bond precision:    | C-C = 0.0030 A               | Wavelength=0.71073                 |
| Cell:              | a=9.4715(3)                  | b=18.0504(5)      c=16.0002(5)     |
|                    | alpha=90                     | beta=96.461(1)      gamma=90       |
| Temperature:       | 100 K                        |                                    |
|                    | Calculated                   | Reported                           |
| Volume             | 2718.09(14)                  | 2718.09(14)                        |
| Space group        | P 21/c                       | P2(1)/c                            |
| Hall group         | -P 2ybc                      | ?                                  |
| Moiety formula     | C30 H21 As Au Cl, C H2 Cl2 ? |                                    |
| Sum formula        | C31 H23 As Au Cl3            | C20.67 H15.33 As0.67<br>Au0.67 Cl2 |
| Mr                 | 773.73                       | 515.82                             |
| Dx,g cm-3          | 1.891                        | 1.891                              |
| Z                  | 4                            | 6                                  |
| Mu (mm-1)          | 6.935                        | 6.935                              |
| F000               | 1488.0                       | 1488.0                             |
| F000'              | 1482.69                      |                                    |
| h,k,lmax           | 16,30,27                     | 16,30,27                           |
| Nref               | 14227                        | 14091                              |
| Tmin,Tmax          | 0.253,0.500                  | 0.133,0.559                        |
| Tmin'              | 0.032                        |                                    |
| Correction method= | MULTI-SCAN                   |                                    |
| Data completeness= | 0.990                        | Theta(max)= 37.400                 |
| R(reflections)=    | 0.0287( 11628)               | wR2(reflections)= 0.0665( 14091)   |
| S =                | 1.018                        | Npar= 325                          |

---

The following ALERTS were generated. Each ALERT has the format

**test-name\_ALERT\_alert-type\_alert-level.**

Click on the hyperlinks for more details of the test.

---

### Alert level B

PLAT971\_ALERT\_2\_B Check Calcd Residual Density 0.81A From Au1 3.17 eA-3  
PLAT971\_ALERT\_2\_B Check Calcd Residual Density 0.88A From Au1 3.03 eA-3

---

### Alert level C

ABSTY02\_ALERT\_1\_C An \_exptl\_absorpt\_correction\_type has been given without  
a literature citation. This should be contained in the  
\_exptl\_absorpt\_process\_details field.  
Absorption correction given as multi-scan

PLAT048\_ALERT\_1\_C MoietyFormula Not Given ..... Please Do !  
PLAT094\_ALERT\_2\_C Ratio of Maximum / Minimum Residual Density .... 2.69 Report  
PLAT125\_ALERT\_4\_C No '\_symmetry\_space\_group\_name\_Hall' Given ..... Please Do !  
PLAT244\_ALERT\_4\_C Low 'Solvent' Ueq as Compared to Neighbors of C31 Check  
PLAT911\_ALERT\_3\_C Missing # FCF Refl Between THmin & STh/L= 0.600 63 Report  
PLAT913\_ALERT\_3\_C Missing # of Very Strong Reflections in FCF .... 4 Note

---

### Alert level G

CELLZ01\_ALERT\_1\_G Difference between formula and atom\_site contents detected.  
CELLZ01\_ALERT\_1\_G ALERT: check formula stoichiometry or atom site occupancies.  
From the CIF: \_cell\_formula\_units\_Z 6  
From the CIF: \_chemical\_formula\_sum C20.67 H15.33 As0.67 Au0.67 Cl2  
TEST: Compare cell contents of formula and atom\_site data

| atom | Z*formula | cif sites | diff  |
|------|-----------|-----------|-------|
| C    | 124.02    | 124.00    | 0.02  |
| H    | 91.98     | 92.00     | -0.02 |
| As   | 4.02      | 4.00      | 0.02  |
| Au   | 4.02      | 4.00      | 0.02  |
| Cl   | 12.00     | 12.00     | 0.00  |

PLAT045\_ALERT\_1\_G Calculated and Reported Z Differ by ..... 0.67 Ratio  
PLAT093\_ALERT\_1\_G No su's on H-positions, refinement reported as . mixed  
PLAT710\_ALERT\_4\_G Delete 1-2-3 or 2-3-4 Linear Torsion Angle ... # 1 Do !  
CL1 -AU1 -AS1 -C10 -68.40 0.40 1.555 1.555 1.555 1.555  
PLAT710\_ALERT\_4\_G Delete 1-2-3 or 2-3-4 Linear Torsion Angle ... # 2 Do !  
CL1 -AU1 -AS1 -C30 169.70 0.40 1.555 1.555 1.555 1.555  
PLAT710\_ALERT\_4\_G Delete 1-2-3 or 2-3-4 Linear Torsion Angle ... # 3 Do !  
CL1 -AU1 -AS1 -C20 49.10 0.40 1.555 1.555 1.555 1.555  
PLAT912\_ALERT\_4\_G Missing # of FCF Reflections Above STh/L= 0.600 77 Note

---

0 **ALERT level A** = Most likely a serious problem - resolve or explain  
2 **ALERT level B** = A potentially serious problem, consider carefully  
7 **ALERT level C** = Check. Ensure it is not caused by an omission or oversight  
8 **ALERT level G** = General information/check it is not something unexpected

6 ALERT type 1 CIF construction/syntax error, inconsistent or missing data  
3 ALERT type 2 Indicator that the structure model may be wrong or deficient  
2 ALERT type 3 Indicator that the structure quality may be low  
6 ALERT type 4 Improvement, methodology, query or suggestion  
0 ALERT type 5 Informative message, check

---

## checkCIF publication errors

---

### Alert level A

PUBL024\_ALERT\_1\_A The number of authors is greater than 5.  
Please specify the role of each of the co-authors  
for your paper.

**Author Response: The design of experiment and synthesis and spectral characterization work was conducted by the visiting scholar Tariq with Khan assistance. The crystal structures solving and refinement were carried out by both Goh and Rosli. Final verification and justification of work were confirmed by both Shawkataly and Fun.**

---

### Alert level G

PUBL017\_ALERT\_1\_G The \_publ\_section\_references section is missing or  
empty.

- 
- 1 **ALERT level A** = Data missing that is essential or data in wrong format
  - 1 **ALERT level G** = General alerts. Data that may be required is missing
- 

### Publication of your CIF

You should attempt to resolve as many as possible of the alerts in all categories. Often the minor alerts point to easily fixed oversights, errors and omissions in your CIF or refinement strategy, so attention to these fine details can be worthwhile. In order to resolve some of the more serious problems it may be necessary to carry out additional measurements or structure refinements. However, the nature of your study may justify the reported deviations from journal submission requirements and the more serious of these should be commented upon in the discussion or experimental section of a paper or in the "special\_details" fields of the CIF. *checkCIF* was carefully designed to identify outliers and unusual parameters, but every test has its limitations and alerts that are not important in a particular case may appear. Conversely, the absence of alerts does not guarantee there are no aspects of the results needing attention. It is up to the individual to critically assess their own results and, if necessary, seek expert advice.

If you wish to submit your CIF for publication in Acta Crystallographica Section C or E, you should upload your CIF via the web. If your CIF is to form part of a submission to another IUCr journal, you will be asked, either during electronic submission or by the Co-editor handling your paper, to upload your CIF via our web site.

---

**PLATON version of 24/07/2014; check.def file version of 24/07/2014**

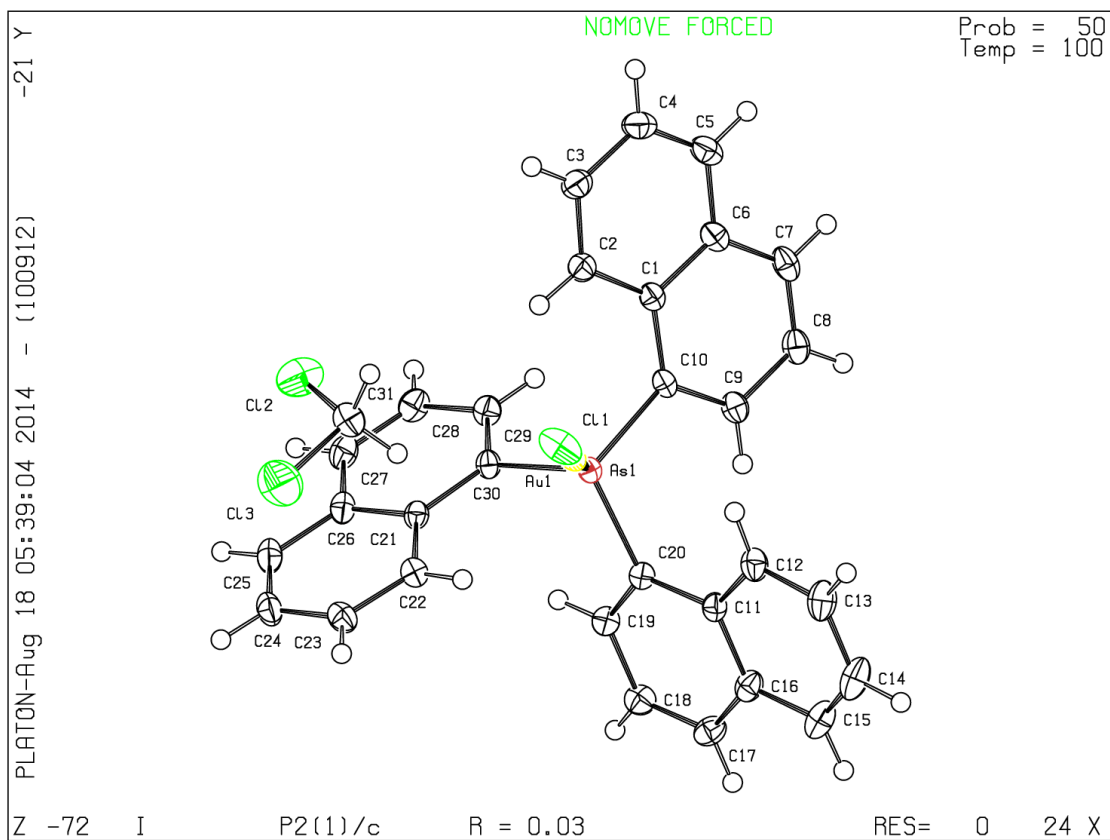

Supplement: S8 (10.1371/journal.pone.0119620.s008) [file journal.pone.0119620.s008]
